# Supplementary material
Source: PubMed Central journal article supplement (PMC1622779)

**A**

**PI**

**FAM**

**Merge**

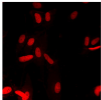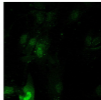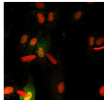

**Phosphodiester**

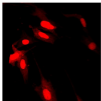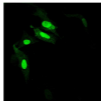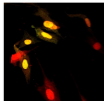

**Phosphorothioate**

**B****No Oligo**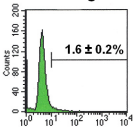**Phosphodiester**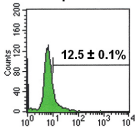**Phosphorothioate**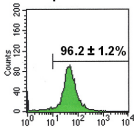

**C****Phosphodiester**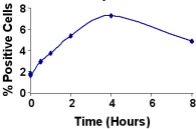**Phosphorothioate**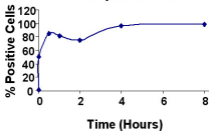

Supplement: pnas_0607332103_7.pdf [file pnas_0607332103_7.pdf]
