# Supplementary material
Source: PubMed Central journal article supplement (PMC1622779)

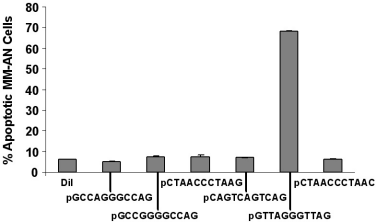

Supplement: pnas_0607332103_1.pdf [file pnas_0607332103_1.pdf]

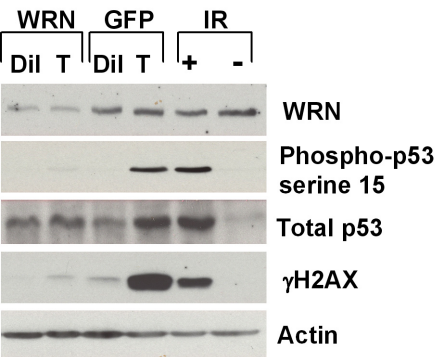

Supplement: pnas_0607332103_10.pdf [file pnas_0607332103_10.pdf]

**A****T-oligo**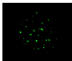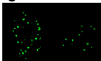 **$\gamma$ H2AX**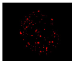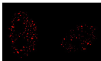**TRF-1**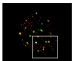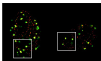**Merge**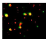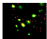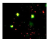

**B****Diluent**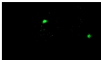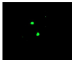 **$\gamma$ H2AX**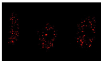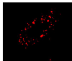**TRF-1**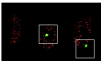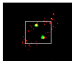**Merge**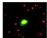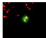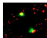

Supplement: pnas_0607332103_2.pdf [file pnas_0607332103_2.pdf]

**A**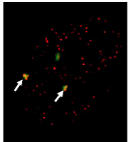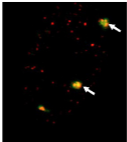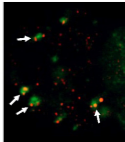

**B**

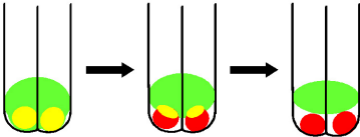

**Sister Chromatids**

Supplement: pnas_0607332103_3.pdf [file pnas_0607332103_3.pdf]

**Diluent**

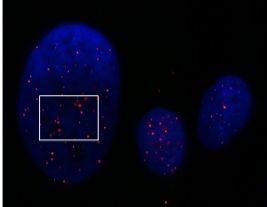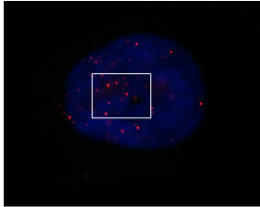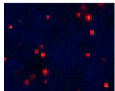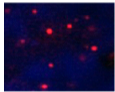

**T-oligo**

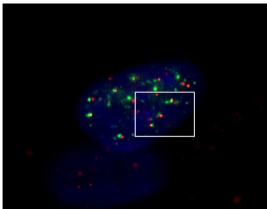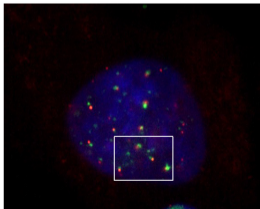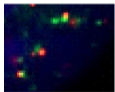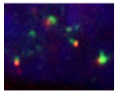

Supplement: pnas_0607332103_4.pdf [file pnas_0607332103_4.pdf]

**A**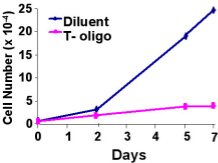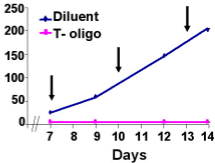

**B**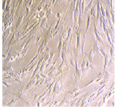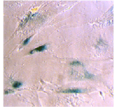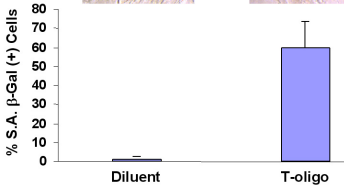

**C**

**Diluent      T-oligo**

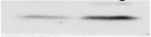

**Total p53**

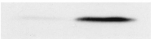

**p53 phosphoserine 15**

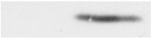

**p21**

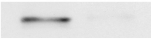

**phospho pRb**

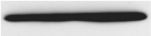

**Actin**

**D**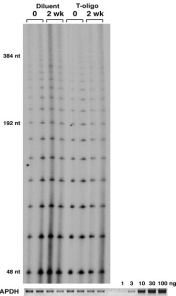

Supplement: pnas_0607332103_5.pdf [file pnas_0607332103_5.pdf]

Diluent

T-oligo

PS T-oligo

Fibroblasts

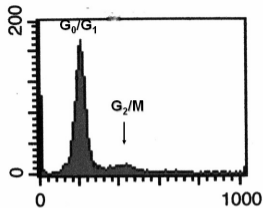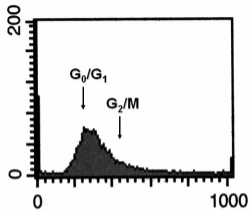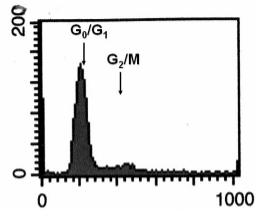

SCC12F

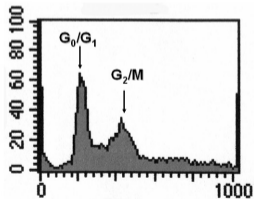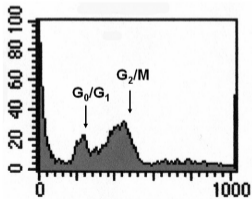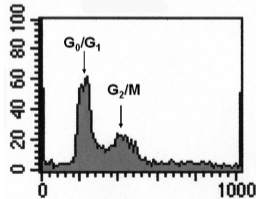

DNA Content

Supplement: pnas_0607332103_6.pdf [file pnas_0607332103_6.pdf]

| Dil | Spacer |    |    | IR |
|-----|--------|----|----|----|
|     | -      | 5' | 3' | +  |

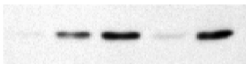

$\gamma$ H2AX

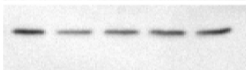

Total H2AX

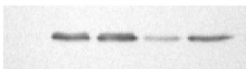

Phospho-p53  
serine 15

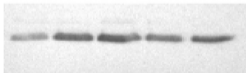

Total p53

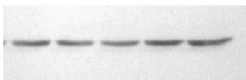

Actin

Supplement: pnas_0607332103_8.pdf [file pnas_0607332103_8.pdf]



Supplement: pnas_0607332103_9.pdf [file pnas_0607332103_9.pdf]
